# Supplementary material for: Alkali chloride doped SnO2 electron-transporting layers for boosting charge transfer and passivating defects in all-inorganic CsPbBr3 perovskite solar cells
Source: Royal Society of Chemistry journal article supplement (doi:10.1039/d1ta02672k), 2021-01-01
Supplement: d1ta02672k1.pdf [file d1ta02672k1.pdf]

## Supporting Information for

# Alkali Chloride Doped SnO<sub>2</sub> Electron-Transporting Layer for Boosting Charge Transfer and Passivating Defects in All-Inorganic CsPbBr<sub>3</sub> Perovskite Solar Cells

Guixiang Xie,<sup>1</sup> Xiaochun Lu,<sup>1</sup> Jialong Duan,<sup>2,\*</sup> Yan Dong,<sup>1</sup> Xiurong Jiang,<sup>1</sup> Fengzhang Tu,<sup>1</sup> Yanyan

Duan,<sup>3</sup> Qunwei Tang<sup>1,2,\*</sup>

<sup>1</sup> College of Chemistry and Material Science, Longyan University, Longyan 364012, PR China;

<sup>2</sup> College of Information Science and Technology, Jinan University, Guangzhou 510632, PR China;

<sup>3</sup> State Centre for International Cooperation on Designer Low-Carbon and Environmental Material (SCICDLCEM), School of Materials Science and Engineering, Zhengzhou University, Zhengzhou

450001, PR China;

\*Corresponding authors. E-mail addresses: duanjialong@jnu.edu.cn; tangqunwei@jnu.edu.cn.

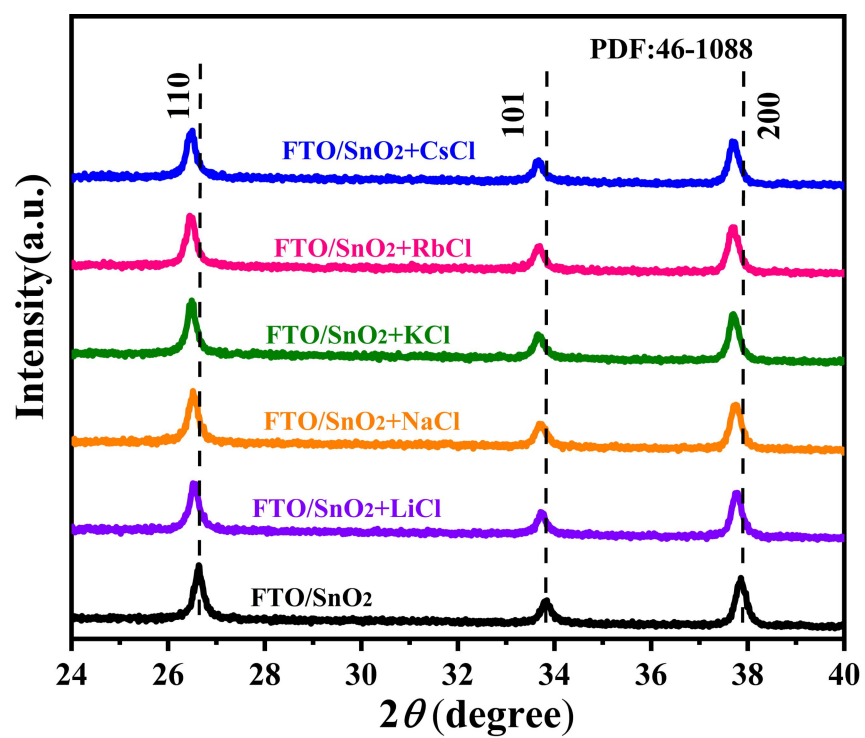

**Figure S1.** XRD patterns of SnO<sub>2</sub> and SnO<sub>2</sub>-MCl (M = Li, Na, K, Rb and Cs) ETLs.

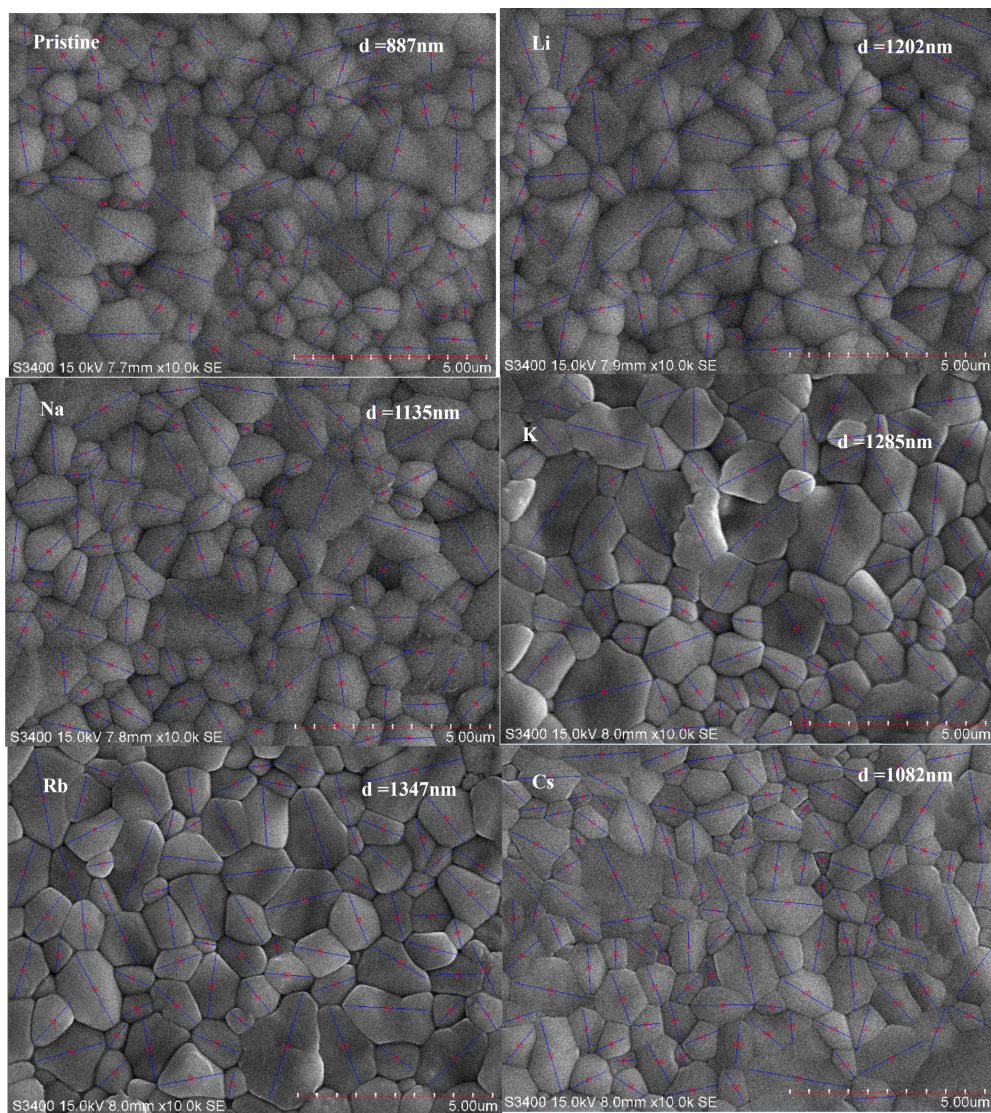

**Figure S2.** Grain size distributions of perovskite films based on  $\text{SnO}_2$  and  $\text{SnO}_2\text{-MCl}$  ( $\text{M} = \text{Li}, \text{Na}, \text{K}, \text{Rb}$  and  $\text{Cs}$ ) ETLs.

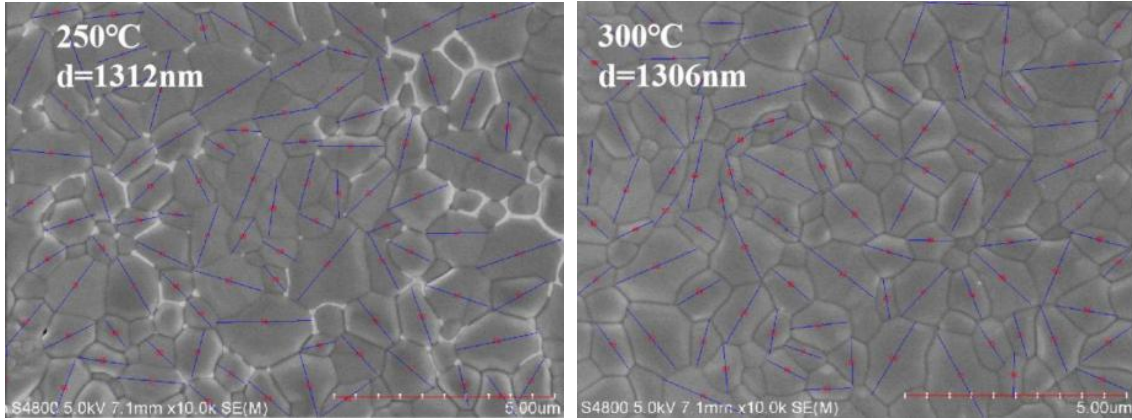

**Figure S3.** Grain size distributions of perovskite films on the surface of SnO<sub>2</sub>-RbCl ETLs annealed at 250 °C (left) and 300 °C (right).

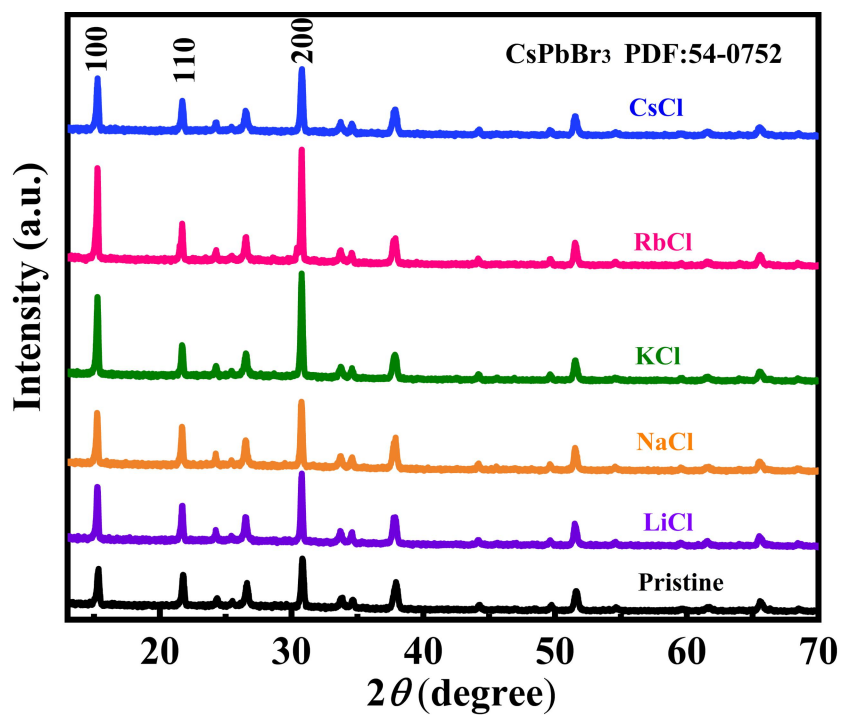

**Figure S4.** XRD patterns of CsPbBr<sub>3</sub> perovskite films based on SnO<sub>2</sub> and SnO<sub>2</sub>-MCl (M = Li, Na, K, Rb and Cs) ETLs.

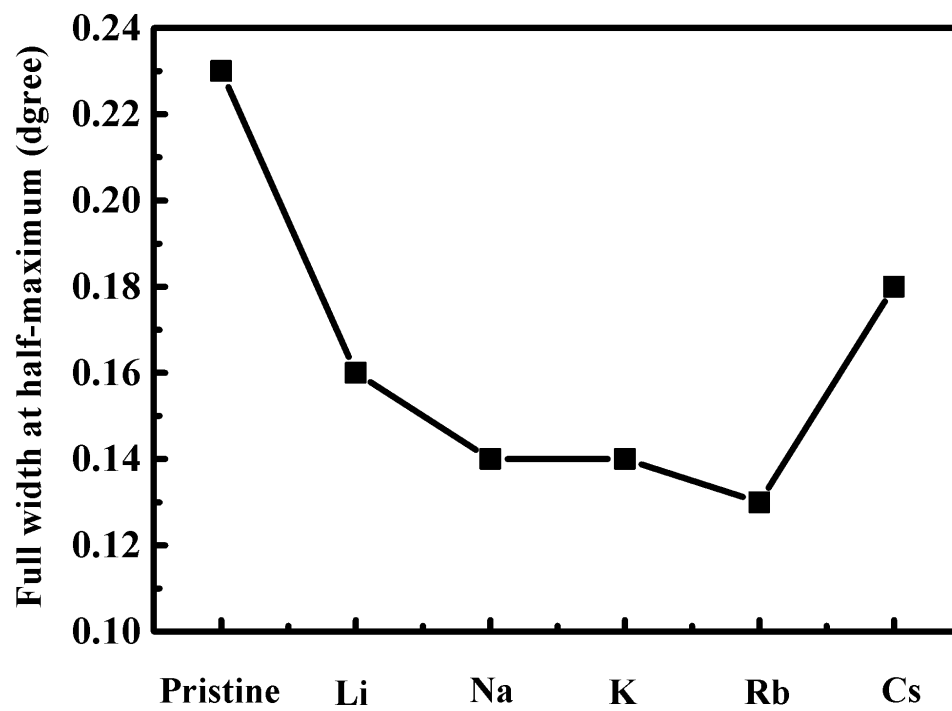

**Figure S5.** The full width at half-maximum evolution of (100) plane of CsPbBr<sub>3</sub> films obtained from Figure S4.

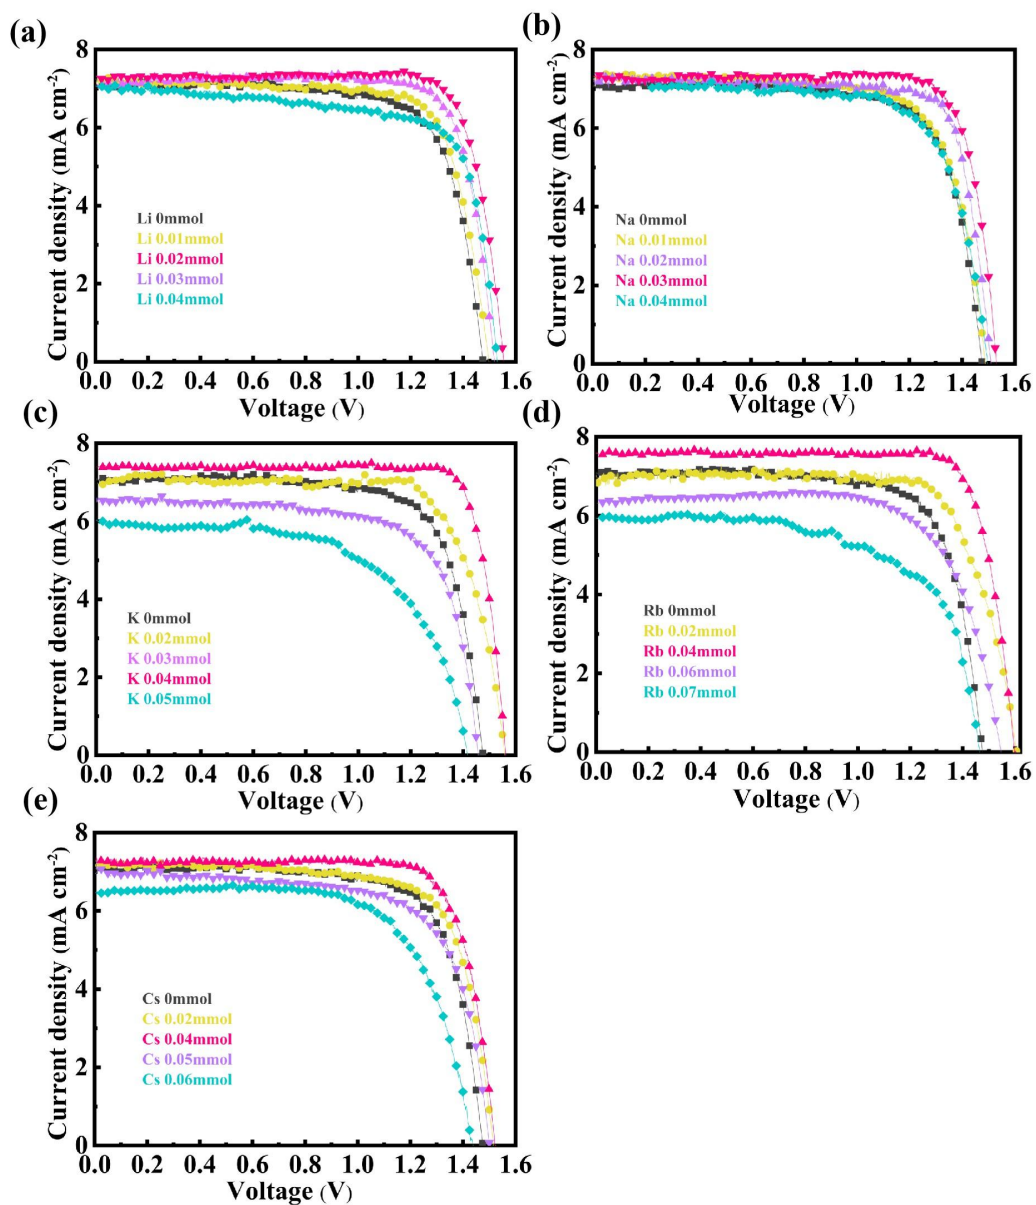

**Figure S6.** *J-V* curves of the inorganic PSCs with (a) SnO<sub>2</sub>-LiCl, (b) SnO<sub>2</sub>-NaCl, (c) SnO<sub>2</sub>-KCl, (d) SnO<sub>2</sub>-RbCl and (e) SnO<sub>2</sub>-CsCl ETLs.

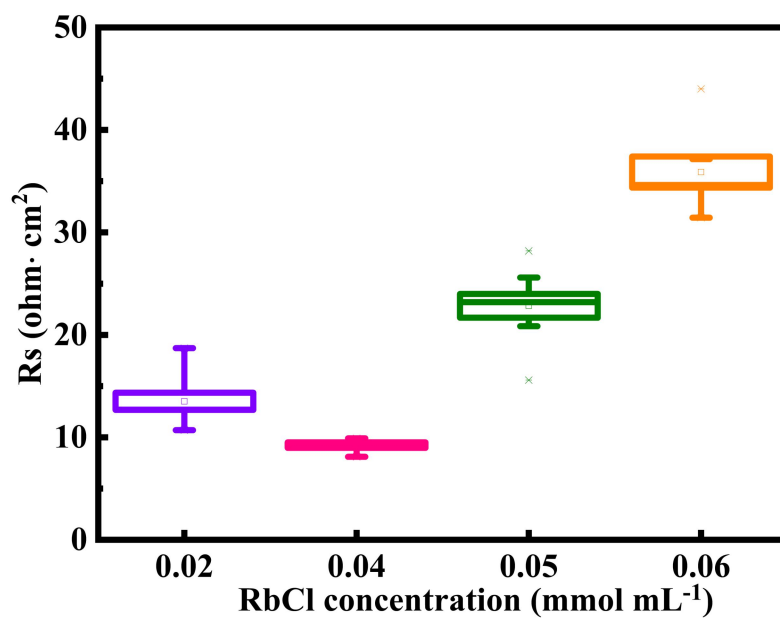

**Figure S7.**  $R_s$  values of PSCs at different RbCl concentrations.



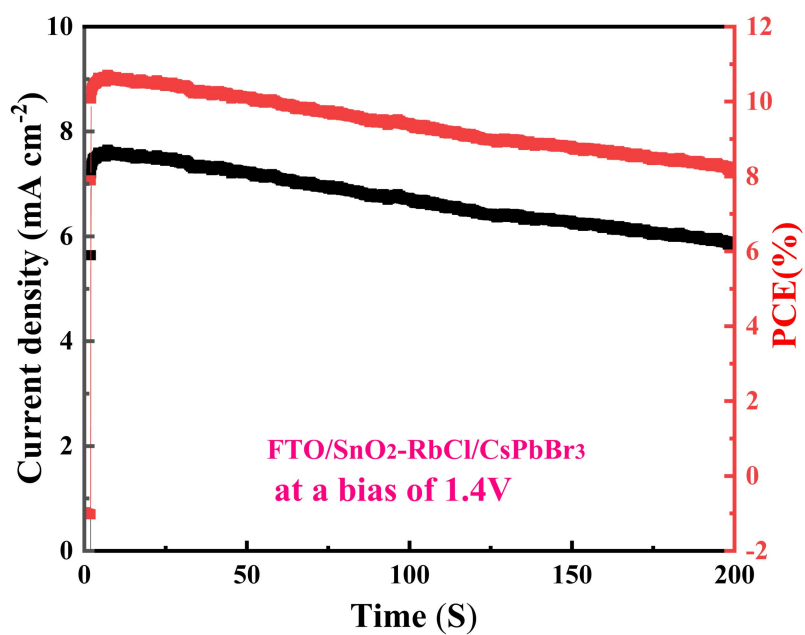

**Figure S8.** Steady-state power output at a maximum power point (bias voltage of 1.4 V) of SnO<sub>2</sub>-RbCl ETL tailored CsPbBr<sub>3</sub> PSC.

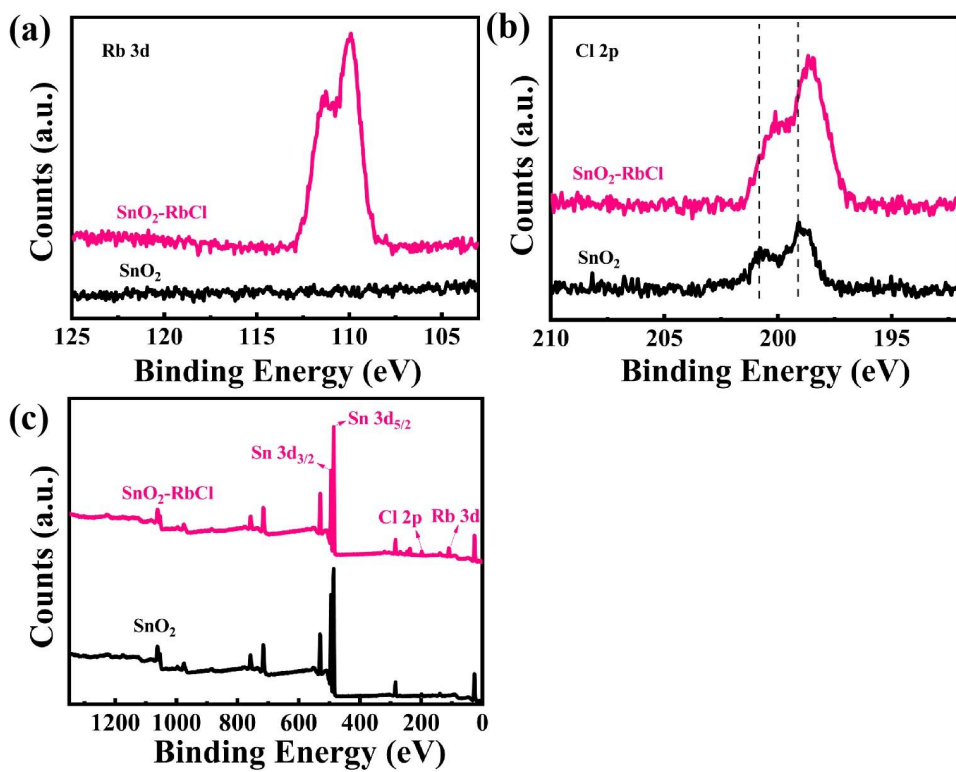

**Figure S9.** XPS spectra of (a) Rb 3d and (b) Cl 2p in SnO<sub>2</sub> and SnO<sub>2</sub>-RbCl ETLs. (c) The whole XPS spectra of SnO<sub>2</sub> and SnO<sub>2</sub>-RbCl films.

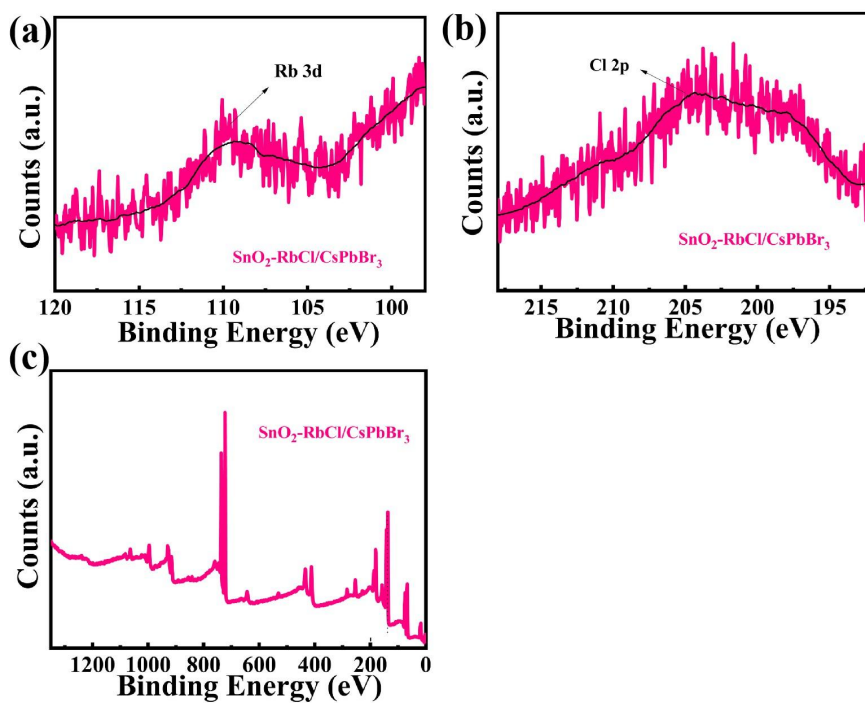

**Figure S10.** XPS spectra of perovskite film fabricated on SnO<sub>2</sub>-RbCl ETL: (a) Rb 3d, (b) Cl 2p and (c) the whole spectrum.

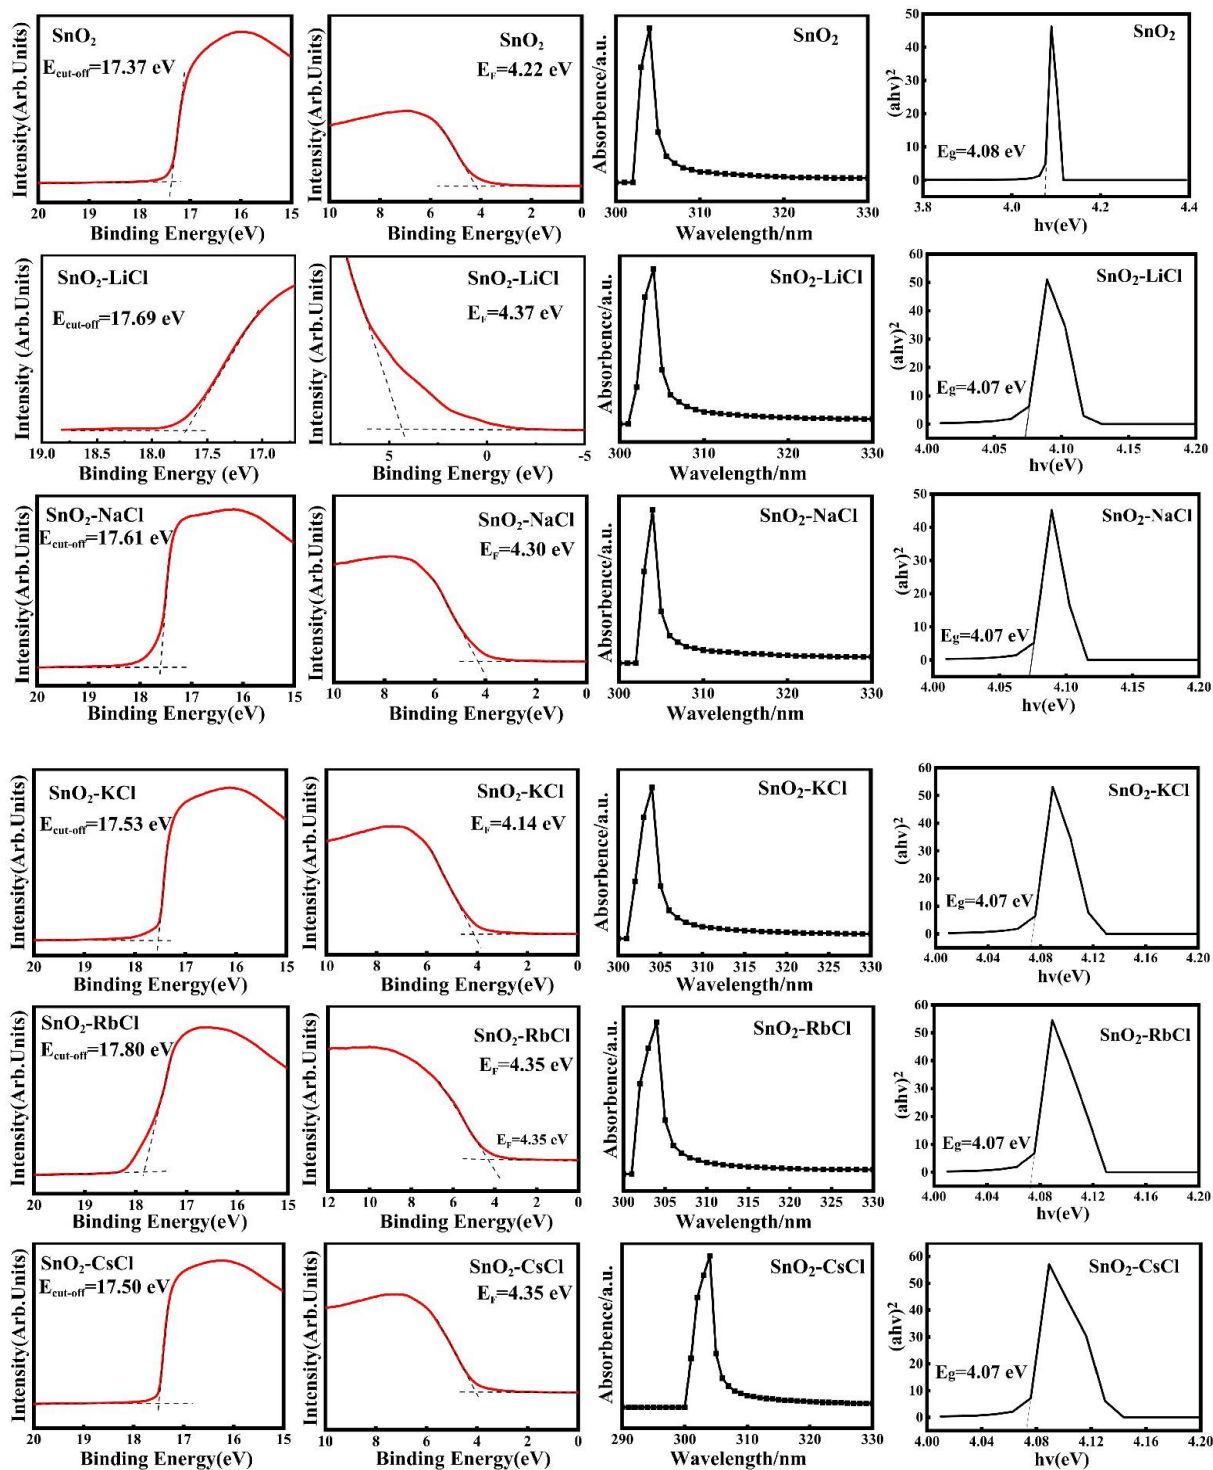

**Figure S11.** UPS spectra and UV-vis spectra of SnO<sub>2</sub> and SnO<sub>2</sub>-MCl (M = Li, Na, K, Rb and Cs) ETLs.

**Table S1.** Comparison of photovoltaic parameters for state-of-the-art CsPbBr<sub>3</sub> PSCs.

| Devices                                                                                                                                                                 | $V_{oc}$<br>(V) | $J_{sc}$<br>(mA cm <sup>-2</sup> ) | PCE<br>(%)   | $FF$<br>(%) | Ref.              |
|-------------------------------------------------------------------------------------------------------------------------------------------------------------------------|-----------------|------------------------------------|--------------|-------------|-------------------|
| <b>FTO/SnO<sub>2</sub>-MCl/CsPbBr<sub>3</sub>/Carbon</b>                                                                                                                | <b>1.601</b>    | <b>7.69</b>                        | <b>10.04</b> | <b>81.6</b> | <b>This work</b>  |
| FTO/ <i>c</i> -TiO <sub>2</sub> / <i>m</i> -TiO <sub>2</sub> /CsPbBr <sub>3</sub> /PTAA/Au                                                                              | 1.25            | 6.70                               | 6.20         | 73.0        | S <sup>[1]</sup>  |
| FTO/ <i>c</i> -TiO <sub>2</sub> / <i>m</i> -TiO <sub>2</sub> /CsPbBr <sub>3</sub> /C                                                                                    | 1.29            | 5.70                               | 5.00         | 68.0        | S <sup>[2]</sup>  |
| FTO/ZnO/CsPbBr <sub>3</sub> -CsPb <sub>2</sub> Br <sub>5</sub> /Spiro-OMeTAD/Au                                                                                         | 1.43            | 6.17                               | 6.81         | 77.2        | S <sup>[3]</sup>  |
| FTO/ <i>c</i> -TiO <sub>2</sub> / <i>m</i> -TiO <sub>2</sub> /CsPbBr <sub>3</sub> /Spiro-OMeTAD/Au                                                                      | 1.34            | 6.52                               | 6.05         | 69.0        | S <sup>[4]</sup>  |
| ITO/ZnO/CsPbBr <sub>3</sub> /Spiro-OMeTAD/Au                                                                                                                            | 1.38            | 6.15                               | 5.98         | 70.51       | S <sup>[5]</sup>  |
| FTO/TiO <sub>2</sub> /CQD-CsPbBr <sub>3</sub> IO/Spiro-OMeTAD/Au                                                                                                        | 1.06            | 11.34                              | 8.29         | 69.0        | S <sup>[6]</sup>  |
| FTO/SnO <sub>2</sub> /CsPbBr <sub>3</sub> /CsSnBr <sub>3</sub> /Carbon                                                                                                  | 1.610           | 7.80                               | 10.60        | 84.4        | S <sup>[7]</sup>  |
| FTO/Sb-TiO <sub>2</sub> /CsPbBr <sub>3</sub> /C                                                                                                                         | 1.654           | 6.70                               | 8.91         | 80.4        | S <sup>[8]</sup>  |
| FTO/ <i>L</i> -TiO <sub>2</sub> :MoSe <sub>2</sub> /CsPbBr <sub>3</sub> /C                                                                                              | 1.615           | 7.88                               | 10.02        | 78.7        | S <sup>[9]</sup>  |
| FTO/ <i>c</i> -TiO <sub>2</sub> / <i>m</i> -TiO <sub>2</sub> /CsPbBr <sub>3</sub> /C                                                                                    | 1.24            | 7.4                                | 6.7          | 73.0        | S <sup>[10]</sup> |
| FTO/ <i>c</i> -TiO <sub>2</sub> /CsPbBr <sub>3</sub> /C                                                                                                                 | 1.34            | 6.46                               | 5.86         | 68.04       | S <sup>[11]</sup> |
| FTO/ <i>m</i> -TiO <sub>2</sub> /CsPbBr <sub>3</sub> /PTAA/Au                                                                                                           | 1.27            | 6.16                               | 5.72         | 73          | S <sup>[12]</sup> |
| FTO/ <i>c</i> -TiO <sub>2</sub> / <i>m</i> -TiO <sub>2</sub> /GQDs/CsPbBr <sub>3</sub> /C                                                                               | 1.458           | 8.12                               | 9.72         | 82.1        | S <sup>[13]</sup> |
| FTO/ <i>c</i> -TiO <sub>2</sub> / <i>m</i> -TiO <sub>2</sub> /Sm <sup>3+</sup> -CsPbBr <sub>3</sub> /C                                                                  | 1.594           | 7.48                               | 10.14        | 85.1        | S <sup>[14]</sup> |
| FTO/SnO <sub>2</sub> /CsPbBr <sub>3</sub> /N-CQDs/C                                                                                                                     | 1.622           | 7.87                               | 10.71        | 80.1        | S <sup>[15]</sup> |
| FTO/ <i>c</i> -TiO <sub>2</sub> / <i>m</i> -TiO <sub>2</sub> /Sm <sup>3+</sup> -CsPbBr <sub>3</sub> /Cu(Cr,Ba)O <sub>2</sub> /C                                         | 1.615           | 7.81                               | 10.79        | 85.5        | S <sup>[16]</sup> |
| FTO/ <i>c</i> -TiO <sub>2</sub> / <i>m</i> -TiO <sub>2</sub> /Sr <sup>2+</sup> -CsPbBr <sub>3</sub> /C                                                                  | 1.54            | 7.71                               | 9.63         | 81.1        | S <sup>[17]</sup> |
| FTO/ <i>c</i> -TiO <sub>2</sub> / <i>m</i> -TiO <sub>2</sub> /GQDs/CsPbBr <sub>3</sub> /MnS/C                                                                           | 1.52            | 8.28                               | 10.45        | 83          | S <sup>[18]</sup> |
| FTO/ <i>c</i> -TiO <sub>2</sub> / <i>m</i> -TiO <sub>2</sub> /CsPbBr <sub>3</sub> /Spiro-OMeTAD/Ag                                                                      | 1.37            | 6.41                               | 6.32         | 72          | S <sup>[19]</sup> |
| FTO/TiO <sub>2</sub> /CsPbBr <sub>3</sub> /C                                                                                                                            | 1.19            | 7.48                               | 6.12         | 68.8        | S <sup>[20]</sup> |
| FTO/ <i>c</i> -TiO <sub>2</sub> /CsPbBr <sub>3</sub> /C                                                                                                                 | 1.49            | 6.89                               | 8.11         | 79          | S <sup>[21]</sup> |
| FTO/ <i>c</i> -TiO <sub>2</sub> /PTI-CsPbBr <sub>3</sub> /spiro-OMeTAD/Ag                                                                                               | 1.498           | 9.78                               | 10.91        | 74.47       | S <sup>[22]</sup> |
| FTO/ <i>c</i> -TiO <sub>2</sub> / <i>m</i> -TiO <sub>2</sub> /GQDs/CsPbBr <sub>3</sub> /P3HT/C                                                                          | 1.36            | 7.02                               | 6.49         | 68          | S <sup>[23]</sup> |
| FTO/ <i>c</i> -TiO <sub>2</sub> /SnO <sub>2</sub> /CsPbBr <sub>3</sub> /CuPc/C                                                                                          | 1.31            | 8.24                               | 8.79         | 81.4        | S <sup>[24]</sup> |
| FTO/ <i>c</i> -TiO <sub>2</sub> /CsPbBr <sub>3</sub> /C                                                                                                                 | 1.545           | 7.37                               | 9.35         | 82.2        | S <sup>[25]</sup> |
| FTO/ <i>c</i> -TiO <sub>2</sub> /CsPbBr <sub>3</sub> /Ti <sub>3</sub> C <sub>2</sub> -MXene/C                                                                           | 1.444           | 8.54                               | 9.01         | 73.08       | S <sup>[26]</sup> |
| FTO/ <i>c</i> -TiO <sub>2</sub> / <i>m</i> -TiO <sub>2</sub> /Sn <sup>2+</sup> -CsPbBr <sub>3</sub> /C                                                                  | 1.37            | 7.66                               | 8.63         | 82.22       | S <sup>[27]</sup> |
| FTO/ <i>c</i> -TiO <sub>2</sub> / <i>m</i> -TiO <sub>2</sub> /CsPbBr <sub>3</sub> /C                                                                                    | 1.22            | 7.40                               | 7.37         | 84.1        | S <sup>[28]</sup> |
| FTO/TiO <sub>2</sub> /CsPb <sub>0.998</sub> Co <sub>0.002</sub> Br <sub>3</sub> /Spiro-OMeTAD/Au                                                                        | 1.357           | 7.45                               | 8.57         | 84.84       | S <sup>[29]</sup> |
| FTO/ <i>c</i> -TiO <sub>2</sub> /CsPbBr <sub>3</sub> /CsPbBr <sub>3</sub> -CsPb <sub>2</sub> Br <sub>5</sub> /CsPbBr <sub>3</sub> -Cs <sub>4</sub> PbBr <sub>6</sub> /C | 1.461           | 9.26                               | 10.17        | 75.39       | S <sup>[30]</sup> |

|                                                                                                                                   |       |      |      |       |                   |
|-----------------------------------------------------------------------------------------------------------------------------------|-------|------|------|-------|-------------------|
| FTO/ <i>c</i> -TiO <sub>2</sub> /CsPbBr <sub>3</sub> /spiro-OMeTAD/Au                                                             | 1.27  | 6.97 | 6.95 | 78.5  | S <sup>[31]</sup> |
| FTO/ <i>c</i> -TiO <sub>2</sub> / <i>m</i> -TiO <sub>2</sub> / <i>m</i> -ZrO <sub>2</sub> /CsPbBr <sub>3</sub> / <i>m</i> -carbon | 1.44  | 7.75 | 8.2  | 73.52 | S <sup>[32]</sup> |
| FTO/ <i>c</i> -TiO <sub>2</sub> /CsPbBr <sub>3</sub> -CsPb <sub>2</sub> Br <sub>5</sub> /spiro-OMeTAD/Ag                          | 1.296 | 8.48 | 8.34 | 75.9  | S <sup>[33]</sup> |
| FTO/ <i>c</i> -TiO <sub>2</sub> /CsPbBr <sub>3</sub> /spiro-OMeTAD/Au                                                             | 1.5   | 5.6  | 5.4  | 62    | S <sup>[34]</sup> |

## Reference

- [1] M. Kulbak, S. Gupta, N. Kedem, I. Levine, T. Bendikov, G. Hodes, D. Cahen, *J. Phys. Chem. Lett.* **2016**, *7*, 167–172.
- [2] X. Chang, W. Li, L. Zhu, H. Liu, H. Geng, S. Xiang, J. Liu, H. Chen, *ACS Appl. Mater. Interfaces* **2016**, *8*, 33649–33655.
- [3] X. Zhang, Z. Jin, J. Zhang, D. Bai, H. Bian, K. Wang, J. Sun, Q. Wang, S. F. Liu, *ACS Appl. Mater. Interfaces* **2018**, *10*, 7145–7154.
- [4] K. C. Tang, P. You, F. Yan, *Sol. RRL* **2018**, *2*, 1800075.
- [5] W. Chen, J. Zhang, G. Xu, R. Xue, Y. Li, Y. Zhou, J. Hou, Y. Li, *Adv. Mater.* **2018**, *30*, 1800855.
- [6] S. Zhou, R. Tang, L. Yin, *Adv. Mater.* **2017**, *29*, 1703682.
- [7] Y. Zhao, J. Duan, H. Yuan, Y. Wang, X. Yang, B. He, Q. Tang, *Sol. RRL* **2019**, 1800284.
- [8] Y. Xu, J. Duan, X. Yang, J. Du, Y. Wang, Y. Duan, Q. Tang, *J. Mater. Chem. A* **2020**, *8*, 11859–11866.
- [9] Q. Zhou, J. Du, J. Duan, Y. Wang, X. Yang, Y. Duan, Q. Tang, *J. Mater. Chem. A* **2020**, *8*, 7784–7791.
- [10] J. Liang, C. Wang, Y. Wang, Z. Xu, Z. Lu, Y. Ma, H. Zhu, Y. Hu, C. Xiao, X. Yi, G. Zhu, H. Lv, L. Ma, T. Chen, Z. Tie, Z. Jin, J. Liu, *J. Am. Chem. Soc.* **2016**, *138*, 15829–15832.
- [11] P. Teng, X. Han, J. Li, Y. Xu, L. Kang, Y. Wang, Y. Yang, T. Yu, *ACS Appl. Mater. Interfaces* **2018**, *10*, 9541–9546.
- [12] M. Kulbak, D. Cahen, G. Hodes, *J. Phys. Chem. Lett.* **2015**, *6*, 2452–2456.
- [13] J. Duan, Y. Zhao, B. He, Q. Tang, *Angew. Chem. Int. Ed.* **2018**, *57*, 3787–3791.
- [14] J. Duan, Y. Zhao, X. Yang, Y. Wang, B. He, Q. Tang, *Adv. Energy Mater.* **2018**, *8*, 1802346.
- [15] Y. Zhao, J. Duan, Y. Wang, X. Yang, Q. Tang, *Nano Energy* **2020**, *67*, 104286.
- [16] J. Duan, Y. Zhao, Y. Wang, X. Yang, Q. Tang, *Angew. Chem. Int. Ed.* **2019**, *58*, 16147–16151.
- [17] Y. Zhao, Y. Wang, J. Duan, X. Yang, Q. Tang, *J. Mater. Chem. A* **2019**, *7*, 6877–6882.
- [18] X. Li, Y. Tan, H. Lai, S. Li, Y. Chen, S. Li, P. Xu, J. Yang, *ACS Appl. Mater. Interfaces* **2019**, *11*, 29746–29752.
- [19] H. Wang, Y. Wu, M. Ma, S. Dong, Q. Li, J. Du, H. Zhang, Q. Xu, *ACS Appl. Energy Mater.* **2019**, *2*, 2305–2312.
- [20] X. Cao, G. Zhang, L. Jiang, Y. Cai, Y. Gao, W. Yang, X. He, Q. Zeng, G. Xing, Y. Jia, J. Wei, *ACS Appl. Mater. Interfaces* **2019**, *12*, 5925–5931.
- [21] X. Wan, Z. Yu, W. Tian, F. Huang, S. Jin, X. Yang, Y.-B. Cheng, A. Hagfeldt, L. Sun, *J. Energy Chem.* **2020**,

46, 8–15.

- [22] G. Tong, T. Chen, H. Li, L. Qiu, Z. Liu, Y. Dang, W. Song, L. K. Ono, Y. Jiang, Y. Qi, *Nano Energy* **2019**, *65*, 104015.
- [23] G. Wang, W. Dong, A. Gurung, K. Chen, F. Wu, Q. He, R. Pathak, Q. Qiao, *J. Power Sources* **2019**, *432*, 48–54.
- [24] X. Liu, X. Tan, Z. Liu, H. Ye, B. Sun, T. Shi, Z. Tang, G. Liao, *Nano Energy* **2019**, *56*, 184–195.
- [25] T. Xiang, Y. Zhang, H. Wu, J. Li, L. Yang, K. Wang, J. Xia, Z. Deng, J. Xiao, W. Li, Z. Ku, F. Huang, J. Zhong, Y. Peng, Y.-B. Cheng, *Sol. Energy Mater. Sol. Cells* **2019**, 110317.
- [26] T. Chen, G. Tong, E. Xu, H. Li, P. Li, Z. Zhu, J. Tang, Y. Qi, Y. Jiang, *J. Mater. Chem. A* **2019**, *7*, 20597–20603.
- [27] H. Guo, Y. Pei, J. Zhang, C. Cai, K. Zhou, Y. Zhu, *J. Mater. Chem. C* **2019**, *7*, 11234–11243.
- [28] D. Huang, P. Xie, Z. Pan, H. Rao, X. Zhong, *J. Mater. Chem. A* **2019**, *7*, 22420–22428.
- [29] D. Wang, W. Li, Z. Du, G. Li, W. Sun, J. Wu, Z. Lan, *J. Mater. Chem. C* **2020**, *8*, 1649–1655.
- [30] G. Tong, T. Chen, H. Li, W. Song, Y. Chang, J. Liu, L. Yu, J. Xu, Y. Qi, Y. Jiang, *Sol. RRL* **2019**, *3*, 1900030.
- [31] J. Lei, F. Gao, H. Wang, J. Li, J. Jiang, X. Wu, R. Gao, Z. Yang, S. (Frank) Liu, *Sol. Energy Mater. Sol. Cells* **2018**, *187*, 1–8.
- [32] I. Poli, J. Baker, J. McGettrick, F. De Rossi, S. Eslava, T. Watson, P. J. Cameron, *J. Mater. Chem. A* **2018**, *6*, 18677–18686.
- [33] H. Li, G. Tong, T. Chen, H. Zhu, G. Li, Y. Chang, L. Wang, Y. Jiang, *J. Mater. Chem. A* **2018**, *6*, 14255–14261.
- [34] Q. A. Akkerman, M. Gandini, F. Di Stasio, P. Rastogi, F. Palazon, G. Bertoni, J. M. Ball, M. Prato, A. Petrozza, L. Manna, *Nat. Energy* **2017**, *2*, 16194.
